# Supplementary material for: Comparative metabolomic study of fungal foliar endophytes and their long-lived host Astrocaryum sciophilum: a model for exploring the chemodiversity of host-microbe interactions
Source: Frontiers journal article supplement (doi:10.3389/fpls.2023.1278745), 2023-12-19
Supplement: Data_Sheet_1.XLSX [file Data_Sheet_1.XLSX]

## Sheet: Sheet3
N° Figure slide	N° cluster slide	ID	Comp. index	RT (min)	m/z		Molecular formula	Molecule Name	Score input	Score final	Lowest match taxon	npclassifier			Inchi	GNPS	npclassifier_Consensus
												pathway	superclass	class
					[M+H]+	[M–H]–											pathway	superclass	class
S11	C1	5159	4461	0.33	245.077		C9H12N2O6	Uridin	Isolated			Carbohydrates	nucleosides	Pyrimidine nucleosides	InChI=1S/C9H12N2O6/c12-3-4-6(14)7(15)8(17-4)11-2-1-5(13)10-9(11)16/h1-2,4,6-8,12,14-15H,3H2,(H,10,13,16)	CCMSLIB00000479752	Carbohydrates	nucleosides	Purine nucleosides
		6408		0.34	284.099		C10H13N5O5	Guanosine	0	8	hypocreales	Carbohydrates	nucleosides	Purine nucleosides	InChI=1S/C10H13N5O5/c11-10-13-7-4(8(19)14-10)12-2-15(7)9-6(18)5(17)3(1-16)20-9/h2-3,5-6,9,16-18H,1H2,(H3,11,13,14,19)/t3-,5-,6-,9-/m1/s1
		10131		0.25	152.057		C5H5N5O	guanine	GNPS			Carbohydrates	nucleosides	Purine nucleosides	InChI=1S/C5H5N5O/c6-5-9-3-2(4(11)10-5)7-1-8-3/h1H,(H4,6,7,8,9,10,11)	CCMSLIB00003136505
S11	C2	4698	911	0.51	282.12		C11H15N5O4	2'-O-Methyladenosine	0	8	['Hypocreales']	Carbohydrates	nucleosides	Purine nucleosides	InChI=1S/C11H15N5O4/c1-19-8-7(18)5(2-17)20-11(8)16-4-15-6-9(12)13-3-14-10(6)16/h3-5,7-8,11,17-18H,2H2,1H3,(H2,12,13,14)/t5-,7-,8-,11-/m1/s1	2`-O-Methyladenosine|(2R,3R,4R,5R)-5-(6-aminopurin-9-yl)-2-(hydroxymethyl)-4-methoxyoxolan-3-ol	Carbohydrates	nucleosides	Purine nucleosides
		4723		0.59	310.114		C12H15N5O5	5-acetyl adenosin	Isolated			Carbohydrates	nucleosides	Purine nucleosides	InChI=1S/C12H15N5O5/c1-5(18)21-2-6-8(19)9(20)12(22-6)17-4-16-7-10(13)14-3-15-11(7)17/h3-4,6,8-9,12,19-20H,2H2,1H3,(H2,13,14,15)
S11	C3	4682	1603	0.86	261.12		C14H16N2O3	Maculosine	Isolated			Amino acids and Peptides			InChI=1S/C14H16N2O3/c17-10-5-3-9(4-6-10)8-11-14(19)16-7-1-2-12(16)13(18)15-11/h3-6,11-12,17H,1-2,7-8H2,(H,15,18)	cyclo(L-Tyr-L-Pro)	polyketides	cyclic polyketides	dipeptides
		4691		0.72	277.118		C14H16N2O4	Phenylalanine, N-(5-oxo-L-prolyl)-	Manual annotation (siriusmatch)			Amino acids and Peptides	small peptides	dipeptides	InChI=1S/C14H16N2O4/c17-12-7-6-10(15-12)13(18)16-11(14(19)20)8-9-4-2-1-3-5-9/h1-5,10-11H,6-8H2,(H,15,17)(H,16,18)(H,19,20)
		81		1.41	245.128		C14H16N2O2	3-benzylhexahydropyrrolo[1,2-a]pyrazine-1,4-dione	Isolated			Amino acids and Peptides			InChI=1S/C14H16N2O2/c17-13-12-7-4-8-16(12)14(18)11(15-13)9-10-5-2-1-3-6-10/h1-3,5-6,11-12H,4,7-9H2,(H,15,17)	Phe-Pr
		3508		0.54	169.097		C8H12N2O2	Cyclo(-D-Ala-L-Pro)	0	7	colletotrichum	Amino acids and Peptides			InChI=1S/C8H12N2O2/c1-5-8(12)10-4-2-3-6(10)7(11)9-5/h5-6H,2-4H2,1H3,(H,9,11)
		4611		0.4	155.081		C7H10N2O2	Cyclo-prolylglycine	Isolated			Amino acids and Peptides	small peptides		InChI=1S/C7H10N2O2/c10-6-4-8-7(11)5-2-1-3-9(5)6/h5H,1-4H2,(H,8,11)	Cyclo-prolylglycine
		8815		1.41	211.134		C11H18N2O2	3-isobutylhexahydropyrrolo[1,2-a]pyrazine-1,4-dione	Isolated			Amino acids and Peptides			InChI=1S/C11H18N2O2/c1-7(2)6-8-11(15)13-5-3-4-9(13)10(14)12-8/h7-9H,3-6H2,1-2H3,(H,12,14)	Massbank:PR300771 Cyclo(proline-leucine)
		3691		1.52	311.129		C18H18N2O3	cyclo(TyrPhe)	Manual annotation (siriusmatch)			Amino acids and Peptides	small peptides	dipeptides	InChI=1S/C18H18N2O3/c21-14-8-6-13(7-9-14)11-16-18(23)19-15(17(22)20-16)10-12-4-2-1-3-5-12/h1-9,15-16,21H,10-11H2,(H,19,23)(H,20,22)
S11	C4	3361	765	393.316	7.45		C28H40O	ergosterol	Isolated			Terpenoids	Steroids	Ergostane steroids	InChI=1S/C28H40O/c1-18(2)19(3)7-8-20(4)24-11-12-25-23-10-9-21-17-22(29)13-15-27(21,5)26(23)14-16-28(24,25)6/h7-10,17-20,24,26H,11-16H2,1-6H3/b8-7+		Terpenoids	Steroids	Ergostane steroids
		874		395.33	5.83		C28H44O		Isolated			Terpenoids	Steroids	Ergostane steroids	InChI=1S/C28H44O/c1-18(2)19(3)7-8-20(4)24-11-12-25-23-10-9-21-17-22(29)13-15-27(21,5)26(23)14-16-28(24,25)6/h7-10,18-20,22,24-26,29H,11-17H2,1-6H3/b8-7+
		826		375.3	5.18		C28H38	(E)-17-(5,6-dimethylhept-3-en-2-yl)-10,13-dimethyl-4,10,12,13,16,17-hexahydro-1H-cyclopenta[a]phenanthrene	0.74	5.74	['Fungi']	Terpenoids	Steroids	Ergostane steroids	InChI=1S/C28H38/c1-19(2)20(3)10-11-21(4)24-14-15-25-23-13-12-22-9-7-8-17-27(22,5)26(23)16-18-28(24,25)6/h7-8,10-13,15-16,19-21,24H,9,14,17-18H2,1-6H3/b11-10+
		566		391.299	6.28		C28H38O	10,13-dimethyl-17-(6-methyl-5-methylenehept-3-en-2-yl)-1,2,9,10,11,12,13,15,16,17-decahydro-3H-cyclopenta[a]phenanthren-3-one	0.53	6.53	['Ascomycota']	Terpenoids	Steroids	Ergostane steroids	InChI=1S/C28H38O/c1-18(2)19(3)7-8-20(4)24-11-12-25-23-10-9-21-17-22(29)13-15-27(21,5)26(23)14-16-28(24,25)6/h7-10,17-18,20,24,26H,3,11-16H2,1-2,4-6H3
		837		377.321	7.24		C28H40	(E)-17-(5,6-dimethylhept-3-en-2-yl)-10,13-dimethyl-2,10,12,13,14,15,16,17-octahydro-1H-cyclopenta[a]phenanthrene	0.53	4.53	['Fungi']	Terpenoids	Steroids	Ergostane steroids	InChI=1S/C28H40/c1-19(2)20(3)10-11-21(4)24-14-15-25-23-13-12-22-9-7-8-17-27(22,5)26(23)16-18-28(24,25)6/h7,9-13,16,19-21,24-25H,8,14-15,17-18H2,1-6H3/b11-10+
S12	C5	1600	455	0.42	215.091		C10H14O5	(5S,6S)-6-((Z)-3,4-dihydroxypent-1-en-1-yl)-5-hydroxy-5,6-dihydro-2H-pyran-2-one	Isolated			Polyketides	Cyclic polyketides	2-pyrone derivatives	InChI=1S/C10H14O5/c1-6(11)7(12)2-4-9-8(13)3-5-10(14)15-9/h2-9,11-13H,1H3/b4-2-/t6?,7?,8-,9-/m0/s1		Polyketides	Cyclic polyketides	2-pyrone derivatives
		1583		0.3	197.081		C10H12O4	(4aR,6S,8aR)-6-((S)-1-hydroxyethyl)-6,8a-dihydropyrano[3,2-b]pyran-2(4aH)-one	0	9	['Botryosphaeriaceae']	Polyketides	Cyclic polyketides	2-pyrone derivatives	InChI=1S/C10H12O4/c1-6(11)7-2-3-9-8(13-7)4-5-10(12)14-9/h2-9,11H,1H3/t6-,7-,8+,9+/m0/s1
		1596		0.8	214.107		C10H15NO4	(Z)-3-((2R,3R,6R)-3-hydroxy-6-((S)-1-hydroxyethyl)-3,6-dihydro-2H-pyran-2-yl)acrylamide	Isolated			polyketides	miscellaneous polyketides	miscellaneous polyketides	InChI=1S/C10H15NO4/c1-6(12)8-3-2-7(13)9(15-8)4-5-10(11)14/h2-9,12-13H,1H3,(H2,11,14)/b5-4-/t6-,7+,8+,9+/m0/s1
		1665		0.99	257.102		C12H16O6	(3R,4R,Z)-4-hydroxy-1-((2S,3S)-3-hydroxy-6-oxo-3,6-dihydro-2H-pyran-2-yl)pent-1-en-3-yl acetate	Isolated			Polyketides	Cyclic polyketides	2-pyrone derivatives	InChI=1S/C12H16O6/c1-7(13)10(17-8(2)14)4-5-11-9(15)3-6-12(16)18-11/h3-7,9-11,13,15H,1-2H3/b5-4-/t7-,9+,10-,11+/m1/s1
S12	C6	2398	5227	0.84	216.1227 (M+NH4+)		C10H14O4	Diplobifuranylone B	Isolated		['Botryosphaeriaceae']	polyketides	miscellaneous polyketides	miscellaneous polyketides	InChI=1S/C10H14O4/c1-6(11)7-2-3-8(13-7)9-4-5-10(12)14-9/h2-3,6-9,11H,4-5H2,1H3			Miscellaneous polyketides
		11268		1.86	316.176 (M+NH4+)		C15H22O6	4,5-dihydroxy-1-(5-oxotetrahydrofuran-2-yl)hex-2-en-1-yl 2-methylbut-2-enoate	0	9	['Diaporthe']	polyketides			InChI=1S/C15H22O6/c1-4-9(2)15(19)21-13(6-5-11(17)10(3)16)12-7-8-14(18)20-12/h4-6,10-13,16-17H,7-8H2,1-3H3
S12	C7	1772	1218	3.07	337.107		C20H16O5	Palmarumycin CP1	Isolated			Polyketides	Naphthalenes	Spirodioxynaphthalenes	InChI=1S/C20H16O5/c21-12-7-8-14(23)19-18(12)13(22)9-10-20(19)24-15-5-1-3-11-4-2-6-16(25-20)17(11)15/h1-8,13,21-23H,9-10H2/t13-/m1/s1		Polyketides	Naphthalenes	Spirodioxynaphthalenes
		1792		3.47	351.122		C21H18O5	(R)-4-methoxy-3,4-dihydro-2H-spiro[naphthalene-1,2'-naphtho[1,8-de][1,3]dioxine]-5,8-diol	Isolated			Polyketides	Naphthalenes	Spirodioxynaphthalenes	InChI=1S/C21H18O5/c1-24-15-10-11-21(20-14(23)9-8-13(22)19(15)20)25-16-6-2-4-12-5-3-7-17(26-21)18(12)16/h2-9,15,22-23H,10-11H2,1H3/t15-/m1/s1
		1750		3.47	319.095		C20H14O4	Palmarumycin CP12,3-Dihydro	0.3944	5.3944	['Ascomycota']	Polyketides	Naphthalenes	Spirodioxynaphthalenes	InChI=1S/C20H14O4/c21-14-7-3-6-13-19(14)15(22)10-11-20(13)23-16-8-1-4-12-5-2-9-17(24-20)18(12)16/h1-9,21H,10-11H2
		1797		2.63	353.103		C20H16O6	2',5'-dihydroxy-6',7'-dihydro-2'H-spiro[naphtho[1,8-de][1,3]dioxine-2,1'-[4a,8a]epoxynaphthalen]-8'(5'H)-one	0.42	8.42	['Botryosphaeriales']	Polyketides	Naphthalenes	Spirodioxynaphthalenes	InChI=1S/C20H16O6/c21-14-7-8-15(22)19-18(14,26-19)10-9-16(23)20(19)24-12-5-1-3-11-4-2-6-13(25-20)17(11)12/h1-6,9-10,14,16,21,23H,7-8H2
S12		21822	2274	251.139	1.01		C13H18N2O3	hydroxyfungerin A	Isolated			Alkaloids	Histidine alkaloids	Imidazole alkaloids	InChI=1S/C13H18N2O3/c1-10(8-16)4-6-12-11(14-9-15(12)2)5-7-13(17)18-3/h4-5,7,9,16H,6,8H2,1-3H3/b7-5+,10-4+		Alkaloids	Histidine alkaloids	Imidazole alkaloids
		20950		265.117	0.97		C13H16N2O4	(E)-4-(4-((E)-3-methoxy-3-oxoprop-1-en-1-yl)-1-methyl-1H-imidazol-5-yl)-2-methylbut-2-enoic acid	Isolated			Alkaloids	Histidine alkaloids	Imidazole alkaloids	InChI=1S/C13H18N2O3/c1-10(8-16)4-6-12-11(14-9-15(12)2)5-7-13(17)18-3/h4-5,7,9,16H,6,8H2,1-3H3/b7-5+,10-4+
		22042	2M+H
C8
S12	C9	20927	2290	251.139	1.11		C13H18N2O3	Fungerin5''-Hydroxy	Isolated			Alkaloids	Histidine alkaloids	Imidazole alkaloids	InChI=1S/C13H18N2O3/c1-10(8-16)4-6-12-11(14-9-15(12)2)5-7-13(17)18-3/h4-5,7,9,16H,6,8H2,1-3H3/b7-5+,10-4-		Alkaloids	Histidine alkaloids	Imidazole alkaloids
		21720	2M+H
S12	C10	20874	270	221.128	1.28		C12H16N2O2	FusagerinF	Isolated			Alkaloids	Histidine alkaloids	Imidazole alkaloids	InChI=1S/C12H16N2O2/c1-9(2)4-6-11-10(5-7-12(15)16)13-8-14(11)3/h4-5,7-8H,6H2,1-3H3,(H,15,16)/b7-5+		Alkaloids	Histidine alkaloids	Imidazole alkaloids
		20901		235.144	1.82		C13H18N2O2	Fungerin	Isolated			Alkaloids	Histidine alkaloids	Imidazole alkaloids	InChI=1S/C13H18N2O2/c1-10(2)5-7-12-11(14-9-15(12)3)6-8-13(16)17-4/h5-6,8-9H,7H2,1-4H3/b8-6+
		21816		237.124	1.96		C12H16N2O3	methyl (E)-3-(5-((Z)-3-hydroxybut-2-en-1-yl)-1-methyl-1H-imidazol-4-yl)acrylate	Manual annotation (propa)			Alkaloids	Histidine alkaloids	Imidazole alkaloids	InChI=1S/C12H16N2O3/c1-9(15)4-6-11-10(13-8-14(11)2)5-7-12(16)17-3/h4-5,7-8,15H,6H2,1-3H3/b7-5+,9-4-
		21197	2M+H
S13	C11	12925	287	169.05	0.77		C8H8O4	3-(2-oxo-2H-pyran-6-yl)propanoic acid	Isolated			Polyketides	Cyclic polyketides	2-pyrone derivatives	InChI=1S/C8H8O4/c9-7(10)5-4-6-2-1-3-8(11)12-6/h1-3H,4-5H2,(H,9,10)		Polyketides	Cyclic polyketides	2-pyrone derivatives
		20175		199.06	1.03		C9H10O5	4-hydroxy-3,5-dimethoxybenzoic acid	0.34	7.34	Ascomycota	Shikimates and Phenylpropanoids	Phenolic acids (C6-C1)	simple phenolic acids	InChI=1S/C9H10O5/c1-13-5-3-6(10)8(9(11)12)7(4-5)14-2/h3-4,10H,1-2H3,(H,11,12)
		11045		151.04	0.77		C8H6O3	7-hydroxyisobenzofuran-1(3H)-one	0.31	7.31	Diaporthales	Polyketides	Cyclic polyketides	phtalides derivatives	InChI=1S/C8H6O3/c9-6-3-1-2-5-4-11-8(10)7(5)6/h1-3,9H,4H2
S13	C12	11092	319	213.076	1.011		C10H12O5	4-(5-(1-hydroxyethyl)furan-2-yl)-4-oxobutanoic acid	Isolated			Polyketides	Cyclic polyketides	Furans	InChI=1S/C10H12O5/c1-6(11)8-3-4-9(15-8)7(12)2-5-10(13)14/h3-4,6,11H,2,5H2,1H3,(H,13,14)		Terpenoids	Octadenoids	Jasmonic acids
		1618		227.128	1.36		C12H18O4	2-((1R,2R)-2-((Z)-5-hydroxypent-2-en-1-yl)-3-oxocyclopentyl)acetic acid	0.26	10.26	Lasiodiplodia	Fatty acyls	Octadenoids	Jasmonic acids	InChI=1S/C12H18O4/c13-7-3-1-2-4-10-9(8-12(15)16)5-6-11(10)14/h1-2,9-10,13H,3-8H2,(H,15,16)/b2-1-/t9-,10-/m1/s1
		1645		M+NH4+
		1591		209.117	1.24		C12H16O3	4,5-Didehydrojasmonic acid	0.52	10.52	Lasiodiplodia	Fatty acyls	Octadenoids	Jasmonic acids	InChI=1S/C12H16O3/c1-2-3-4-5-10-9(8-12(14)15)6-7-11(10)13/h3-4,6-7,9-10H,2,5,8H2,1H3,(H,14,15)/b4-3-/t9-,10+/m1/s1
		1593		211.133	1.34		C12H18O3	Jasmonic Acid	0.47	10.47	Lasiodiplodia	Fatty acyls	Octadenoids	Jasmonic acids	InChI=1S/C12H18O3/c1-2-3-4-5-9-6-11(13)7-10(9)8-12(14)15/h3-4,9-10H,2,5-8H2,1H3,(H,14,15)/b4-3-	Jasmonic Acid
		1644		M+CH3OH+
		1619		229.143	1.35		C12H20O4	(-)-11-hydroxy-9,10-dihydrojasmonic acid	Manual annotation (siriusmatch)			Fatty acyls	Octadenoids	Jasmonic acids	InChI=1S/C12H20O4/c1-8(13)3-2-4-10-9(7-12(15)16)5-6-11(10)14/h8-10,13H,2-7H2,1H3,(H,15,16)
		1615		225.15	1.95		C13H20O3	3-((1R,2S)-3-oxo-2-((Z)-pent-2-en-1-yl)cyclopentyl)propanoic acid	24	9.24	Lasiodiplodia	Fatty acyls	Octadenoids	Jasmonic acids	InChI=1S/C13H20O3/c1-2-3-4-5-11-10(6-8-12(11)14)7-9-13(15)16/h3-4,10-11H,2,5-9H2,1H3,(H,15,16)/b4-3-/t10-,11+/m1/s1	Methyl jasmonate
S13	C13	11054	1761	183.066	1.5		C9H10O4	Vermopyrone	Isolated			Polyketides	Cyclic polyketides	2-pyrone derivatives	InChI=1S/C9H10O4/c1-5-7(12-3)4-8(6(2)10)13-9(5)11/h4H,1-3H3		Polyketides	Phloroglucinols	Acyl phloroglucinols
		8045		169.05	1.13		C8H8O4		0.67	8.67	['Pestalotiopsis']	Polyketides	Cyclic polyketides	2-pyrone derivatives	InChI=1S/C8H8O4/c1-5(9)7-3-6(11-2)4-8(10)12-7/h3-4H,1-2H3
S13	C14	91	1300	255.123	2.07		C13H18O5	5-(4-methoxy-3-methyl-2-oxo-2H-pyran-6-yl)hexanoic acid	Isolated			Polyketides	Cyclic polyketides	2-pyrone derivatives	InChI=1S/C13H18O5/c1-8(5-4-6-12(14)15)10-7-11(17-3)9(2)13(16)18-10/h7-8H,4-6H2,1-3H3,(H,14,15)		Polyketides	Cyclic polyketides	2-pyrone derivatives
		618		241.107	1.81		C13H20O4	(R)-6-(1-hydroxyheptyl)-4-methoxy-2H-pyran-2-one	0	8	['Xylariales']	Polyketides	Cyclic polyketides	2-pyrone derivatives	InChI=1S/C13H20O4/c1-3-4-5-6-7-11(14)12-8-10(16-2)9-13(15)17-12/h8-9,11,14H,3-7H2,1-2H3/t11-/m1/s1
		615		237.112	2.07		C13H16O4	6-(1-Hydroxy-2-methyl-1-propenyl)-5-(1-oxobutyl)-2H-pyran-2-one	Manual annotation (propa_CFMID))			Polyketides	Cyclic polyketides	2-pyrone derivatives	InChI=1S/C13H16O4/c1-4-5-10(14)9-6-7-11(15)17-13(9)12(16)8(2)3/h6-7,16H,4-5H2,1-3H3
		596		209.117	2.07		C12H16O3	4-methoxy-3-methyl-6-(pent-2-en-3-yl)-2H-pyran-2-one	0.87	7.87	['Ascomycota']	Polyketides	Cyclic polyketides	2-pyrone derivatives	InChI=1S/C12H16O3/c1-5-9(6-2)11-7-10(14-4)8(3)12(13)15-11/h5,7H,6H2,1-4H3
S13	C15	612	80	235.169	2.55		C15H22O2	(1S,4R)-1,4,8-trimethyltricyclo[7.2.0.02,5]undec-8-ene-4-carboxylic acid	Isolated			Terpenoids	Sesquiterpenoids	Aromadendrane sesquiterpenoids	InChI=1S/C15H22O2/c1-9-4-5-11-12(8-15(11,3)13(16)17)14(2)7-6-10(9)14/h11-12H,4-8H2,1-3H3,(H,16,17)/t11?,12?,14-,15-/m1/s1		Terpenoids	Sesquiterpenoids	Eremophilane sesquiterpenoids
		19088		249.185	6.72		C16H24O2	Pestalopyronemethyl (1S,4R)-1,4,8-trimethyltricycloundec-8-ene-4-carboxylate	0.62	4.62	['Eukaryota']	Terpenoids	Sesquiterpenoids	Eremophilane sesquiterpenoids	InChI=1S/C16H24O2/c1-11-6-5-7-14-9-8-13(10-16(11,14)3)12(2)15(17)18-4/h7,11,13H,2,5-6,8-10H2,1,3-4H3
		42280		207.17	1.99		C14H22O	(1R,3S,4S)-4-methyl-1-(prop-1-en-2-yl)-3,4-divinylcyclohexan-1-ol	0.782736	6.78	['Streptophyta']	Terpenoids	Sesquiterpenoids	Elemane sesquiterpenoids	InChI=1S/C14H22O/c1-6-12-10-14(15,11(3)4)9-8-13(12,5)7-2/h6-7,12,15H,1-3,8-10H2,4-5H3/t12-,13-,14-/m1/s1
S14		7056	414	374.232	4.83		C22H31NO4	Equisetin	Standard		Fusarium	Polyketides	Cyclic polyketides	3-Decalinoyltetramic acids	InChI=1S/C22H31NO4/c1-5-6-15-9-8-14-11-13(2)7-10-16(14)22(15,3)20(26)18-19(25)17(12-24)23(4)21(18)27/h5-6,8-9,13-17,24-25H,7,10-12H2,1-4H3/b6-5+	NCGC00384969-01_C22H31NO4_(5R)-3-({(1S,2R,4aS,6R,8aR)-1,6-Dimethyl-2-[(1E)-1-propen-1-yl]-1,2,4a,5,6,7,8,8a-octahydro-1-naphthalenyl}carbonyl)-4-hydroxy-5-(hydroxymethyl)-1-methyl-1,5-dihydro-2H-pyrrol-2-one	Polyketides	Meroterpenoids	Tetraketide meroterpenoids
		7049		370.238	6.37		C23H31NO3	((2R)-5-hydroxy-2-(1-hydroxyethyl)-2H-pyrrol-4-yl)((1S,2R,4aS,6R,8aR)-6-methyl-2-((1E,3E)-penta-1,3-dien-1-yl)-1,2,4a,5,6,7,8,8a-octahydronaphthalen-1-yl)methanone	0.23	6.23	Ascomycota	Polyketides	Cyclic polyketides	3-Decalinoyltetramic acids	InChI=1S/C23H31NO3/c1-4-5-6-7-16-9-10-17-12-14(2)8-11-18(17)21(16)22(26)19-13-20(15(3)25)24-23(19)27/h4-7,9-10,13-18,20-21,25H,8,11-12H2,1-3H3,(H,24,27)/b5-4+,7-6+/t14-,15?,16-,17-,18-,20-,21-/m1/s1
		9635		386.269	6.35		C24H35NO3	Ascosalipyrrolidinone B	0.424194	6.42	['Ascomycota']	Polyketides	Cyclic polyketides	3-Decalinoyltetramic acids	InChI=1S/C24H35NO3/c1-8-14(3)19-16(5)11-17-10-13(2)9-15(4)20(17)21(19)22(26)18-12-24(6,28-7)25-23(18)27/h8,11-13,15,17,19-21H,9-10H2,1-7H3,(H,25,27)/b14-8+
		9601		360.215	4.37		C21H29NO4	Oxasetin	0.56	10.56	Fusarium	Polyketides	Cyclic polyketides	3-Decalinoyltetramic acids	InChI=1S/C21H29NO4/c1-4-5-14-8-7-13-10-12(2)6-9-15(13)21(14,3)19(25)17-18(24)16(11-23)22-20(17)26/h4-5,7-8,12-16,23-24H,6,9-11H2,1-3H3,(H,22,26)/b5-4+
		9677		414.264	5.69		C25H35NO4	Coniosetin	0.25	7.25	['Nectriaceae']	Polyketides	Cyclic polyketides	3-Decalinoyltetramic acids	InChI=1S/C25H35NO4/c1-6-7-8-9-18-15(3)13-17-12-14(2)10-11-19(17)25(18,5)23(29)20-22(28)21(16(4)27)26-24(20)30/h6-9,13-14,16-19,21,27,29H,10-12H2,1-5H3,(H,26,30)/b7-6+,9-8+,23-20-
		5661		388.254	5.37		C23H33NO4	(Z)-3-((1,6-dimethyl-2-((E)-prop-1-en-1-yl)-1,2,4a,5,6,7,8,8a-octahydronaphthalen-1-yl)(hydroxy)methylene)-5-(1-hydroxyethyl)-1-methylpyrrolidine-2,4-dione	0.2	8.2	['Pleosporales']	Polyketides	Cyclic polyketides	3-Decalinoyltetramic acids	InChI=1S/C23H33NO4/c1-6-7-16-10-9-15-12-13(2)8-11-17(15)23(16,4)21(27)18-20(26)19(14(3)25)24(5)22(18)28/h6-7,9-10,13-17,19,25,27H,8,11-12H2,1-5H3/b7-6+,21-18-
		9680		416.28	6.01		C25H37NO4	3-((2-(but-2-en-2-yl)-1a,4-dimethyldecahydronaphtho[1,2-b]oxiren-3-yl)(hydroxy)methylene)-5-isopropyl-1-methylpyrrolidine-2,4-dione	0.21	6.21	['Ascomycota']	Amino acids and Peptides	Cyclic polyketides	3-Decalinoyltetramic acids	InChI=1S/C25H37NO4/c1-8-13(4)19-17(16-14(5)10-9-11-15(16)23-25(19,6)30-23)21(27)18-22(28)20(12(2)3)26(7)24(18)29/h8,12,14-17,19-20,23,27H,9-11H2,1-7H3
S15		3923	553	480.274	2.99		C29H37NO5	Cytochalasin B	Standard		['Pleosporaceae']	Alkaloids	Pseudoalkaloids	Cytochalasan alkaloids	InChI=1S/C29H37NO5/c1-18-9-7-13-22(31)15-16-25(32)35-29-23(14-8-10-18)27(33)20(3)19(2)26(29)24(30-28(29)34)17-21-11-5-4-6-12-21/h4-6,8,11-12,14-16,18-19,22-24,26-27,31,33H,3,7,9-10,13,17H2,1-2H3,(H,30,34)/b14-8-,16-15+		Alkaloids	Pseudoalkaloids	Cytochalasan alkaloids
		54117		480.283	2.996		C29H37NO5	Cytochalasin B	Standard		['Streptophyta']	Alkaloids	Pseudoalkaloids	Cytochalasan alkaloids	InChI=1S/C29H37NO5/c1-18-9-7-13-22(31)15-16-25(32)35-29-23(14-8-10-18)27(33)20(3)19(2)26(29)24(30-28(29)34)17-21-11-5-4-6-12-21/h4-6,8,11-12,14-16,18-19,22-24,26-27,31,33H,3,7,9-10,13,17H2,1-2H3,(H,30,34)/b14-8-,16-15+
		3927		482.289	3.66		C29H39NO5	7,18,19-Trihydroxy-16,18-dimethyl-10-phenyl[11]cytochalasa-6(12),13-diene-1,21-dione19-Me ether (CytochalasinIv)	0.72	8.72	['Pleosporales']	Alkaloids	Pseudoalkaloids	Cytochalasan alkaloids	InChI=1S/C29H39NO5/c1-17-10-9-13-21-26(32)19(3)18(2)25-22(14-20-11-7-6-8-12-20)30-27(33)29(21,25)23(31)15-24(35-5)28(4,34)16-17/h6-9,11-13,17-18,21-22,24-26,32,34H,3,10,14-16H2,1-2,4-5H3,(H,30,33)/b13-9+
		3895		464.277	3.66		C29H37NO4	AscochalasinΔ5-Isomer, 21,22-didehydro(E-)	0.84	9.84	['Pleosporaceae']	Alkaloids	Pseudoalkaloids	Cytochalasan alkaloids	InChI=1/C29H37NO4/c1-18-9-7-13-22(31)15-16-25(32)29-23(14-8-10-18)27(33)20(3)19(2)26(29)24(30-28(29)34)17-21-11-5-4-6-12-21/h4-6,8,11-12,14-16,18,22-24,26-27,31,33H,7,9-10,13,17H2,1-3H3,(H,30,34)/b14-8+,16-15-
		5762		462.268	4.44		C29H35NO4	Ascochalasin21,22-Didehydro(E-), 20-ketone	0.74	8.74	['Pleosporaceae']	Alkaloids	Pseudoalkaloids	Cytochalasan alkaloids	InChI=1/C29H35NO4/c1-18-9-7-13-22(31)15-16-25(32)29-23(14-8-10-18)27(33)20(3)19(2)26(29)24(30-28(29)34)17-21-11-5-4-6-12-21/h4-6,8,11-12,14-16,18-19,23-24,26-27,33H,3,7,9-10,13,17H2,1-2H3,(H,30,34)/b14-8+,16-15-
		5778		466.303	4.87		C29H39NO4	Ascochalasin	0.65	8.65	['Pleosporaceae']	Alkaloids	Pseudoalkaloids	Cytochalasan alkaloids	InChI=1S/C29H39NO4/c1-18-9-7-13-22(31)15-16-25(32)29-23(14-8-10-18)27(33)20(3)19(2)26(29)24(30-28(29)34)17-21-11-5-4-6-12-21/h4-6,8,11-12,14,18-19,22-24,26-27,31,33H,3,7,9-10,13,15-17H2,1-2H3,(H,30,34)/b14-8+
		5791		478.257	3.57		C29H35NO5	Cytochalasin a	0.76	9.75	['Pleosporaceae']	Alkaloids	Pseudoalkaloids	Cytochalasan alkaloids	InChI=1S/C29H35NO5/c1-18-9-7-13-22(31)15-16-25(32)35-29-23(14-8-10-18)27(33)20(3)19(2)26(29)24(30-28(29)34)17-21-11-5-4-6-12-21/h4-6,8,11-12,14-16,18-19,23-24,26-27,33H,3,7,9-10,13,17H2,1-2H3,(H,30,34)/b14-8-,16-15+
		4352		496.265	3.29		C29H37NO6	Cytochalasin B2'-Hydroxy	0.62	8.62	['Pleosporaceae']	Alkaloids	Pseudoalkaloids	Cytochalasan alkaloids	InChI=1S/C29H37NO6/c1-17-6-4-8-21(31)14-15-25(33)36-29-23(9-5-7-17)27(34)19(3)18(2)26(29)24(30-28(29)35)16-20-10-12-22(32)13-11-20/h5,9-15,17-18,21,23-24,26-27,31-32,34H,3-4,6-8,16H2,1-2H3,(H,30,35)
		3978		510.283	3.63		C32H35N3O3	7,18,19-Trihydroxy-16,18-dimethyl-10-phenyl[11]cytochalasa-6(12),13-diene-1,21-dione19-Ac	0.45	6.45	['Ascomycota']	Alkaloids	Pseudoalkaloids	Cytochalasan alkaloids	InChI=1S/C32H35N3O3/c1-17-8-7-10-22-29-31(4,38-29)19(3)27-25(15-20-16-33-23-11-6-5-9-21(20)23)35-30(37)32(22,27)26-13-12-24(34-26)28(36)18(2)14-17/h5-7,9-14,16-17,19,22,25,27,29,33-34H,8,15H2,1-4H3,(H,35,37)/b10-7+,18-14+
		52197		522.285	3.98		C31H39NO6	(3E,11Z)-16-benzyl-5,18-dihydroxy-9,15-dimethyl-14-methylene-2-oxo-5,6,7,8,9,10,12a,13,14,15,15a,16-dodecahydro-2H-[1]oxacyclotetradecino[2,3-d]isoindol-13-yl acetate	0.45	4.45	['Eukaryota']	Alkaloids	Pseudoalkaloids	Cytochalasan alkaloids	InChI=1S/C31H39NO6/c1-19-10-8-14-24(34)16-17-27(35)38-31-25(15-9-11-19)29(37-22(4)33)21(3)20(2)28(31)26(32-30(31)36)18-23-12-6-5-7-13-23/h5-7,9,12-13,15-17,19-20,24-26,28-29,34H,3,8,10-11,14,18H2,1-2,4H3,(H,32,36)/b15-9-,17-16+
